# Supplementary material for: Cation substitution enables the complete conversion of 1D perovskites to 3D perovskites for photovoltaic application
Source: Royal Society of Chemistry journal article supplement (doi:10.1039/c9nr04801d), 2019-01-01
Supplement: c9nr04801d1.pdf [file c9nr04801d1.pdf]

## **Cation substitution enables the complete conversion of 1D to 3D perovskite for photovoltaic application**

Fuchang Wang<sup>a</sup>, Weiping Li<sup>a</sup>, Huicong Liu<sup>a</sup>, Liqun Zhu<sup>a</sup>, Haining Chen<sup>a\*</sup>.  
a. School of Materials Science and Engineering, Beihang University, No. 37 Xueyuan Road,  
Haidian District, Beijing 100191, People's Republic of China.  
\*Corresponding email: [chenhaining@buaa.edu.cn](mailto:chenhaining@buaa.edu.cn)

### **Supporting Information**

## Supplementary results:

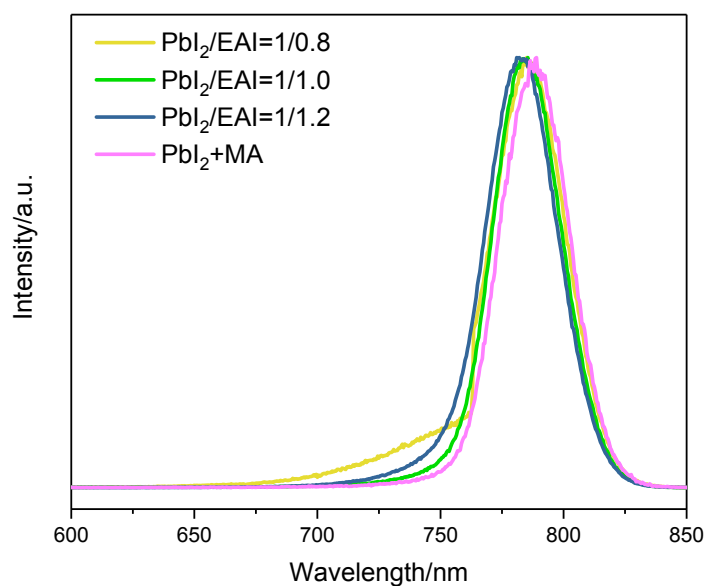

Fig. S1 The normalized PL spectra of the different perovskite films

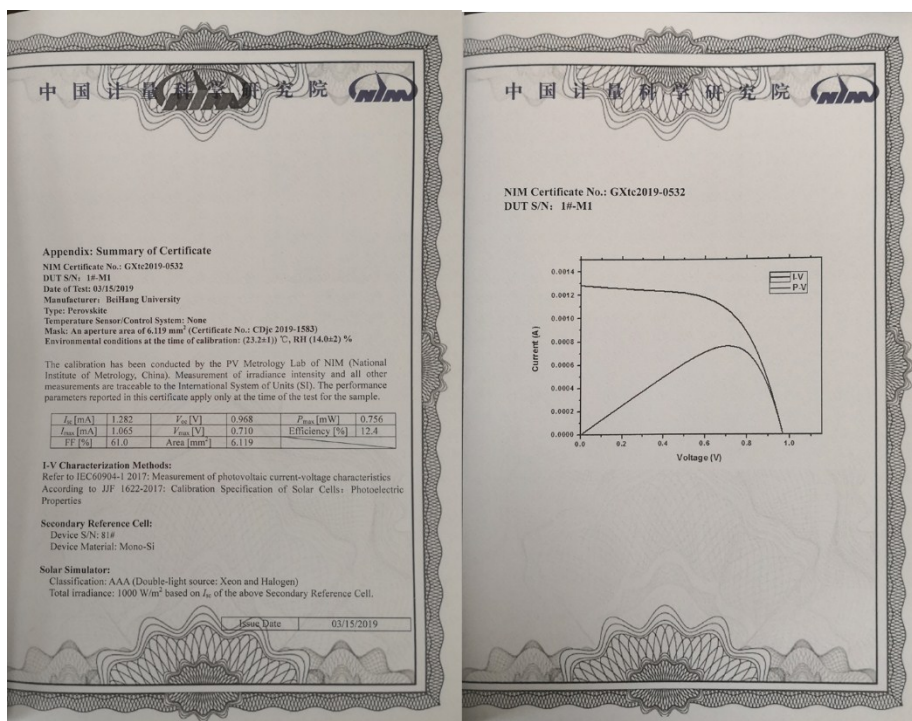

Fig. S2 The calibration results from The National Institute of Metrology (NIM)

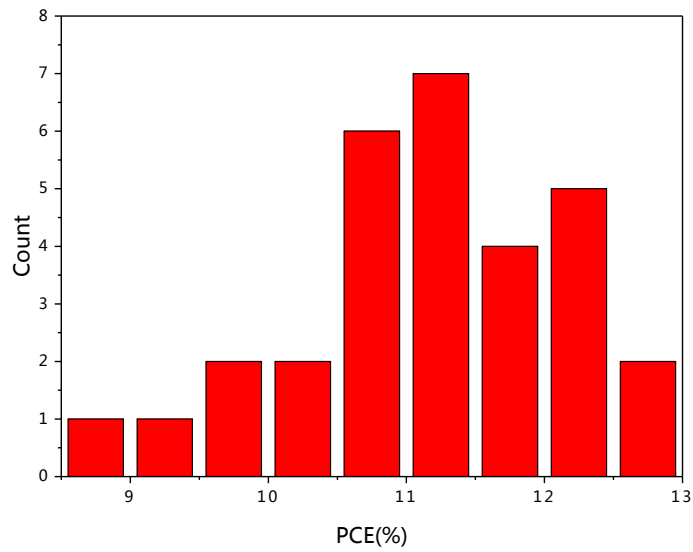

Fig. S3 The histogram of power conversion efficiencies (PCEs) of the device fabricated from  $\text{PbI}_2/\text{EAI}=1/1$  precursor.

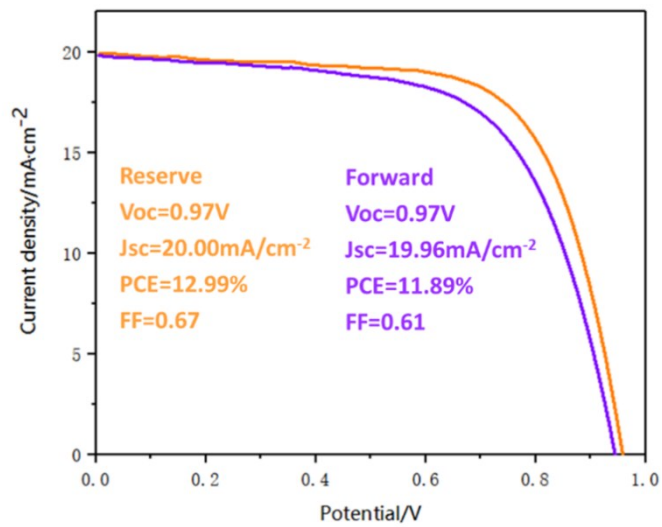

Fig. S4  $J$ - $V$  curves of the cell recorded in reverse and forward scanning directions

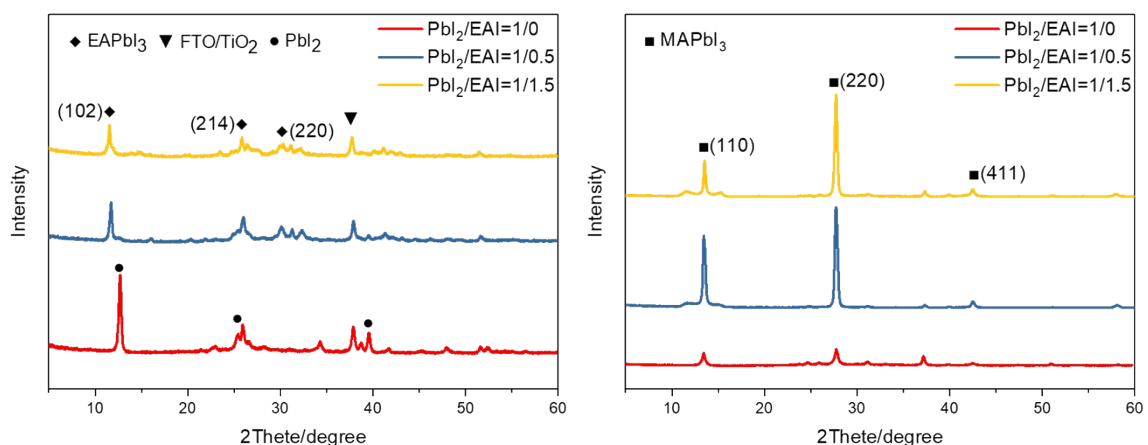

Fig. S5 XRD patterns of the 1D EAPbI<sub>3</sub> films obtained from the EAPbI<sub>3</sub> solutions with different PbI<sub>2</sub>/EAI ratios (the ratio of PbI<sub>2</sub>/EAI=1/0, 1/0.5, 1/1.5) before and after the MA gas treatment.

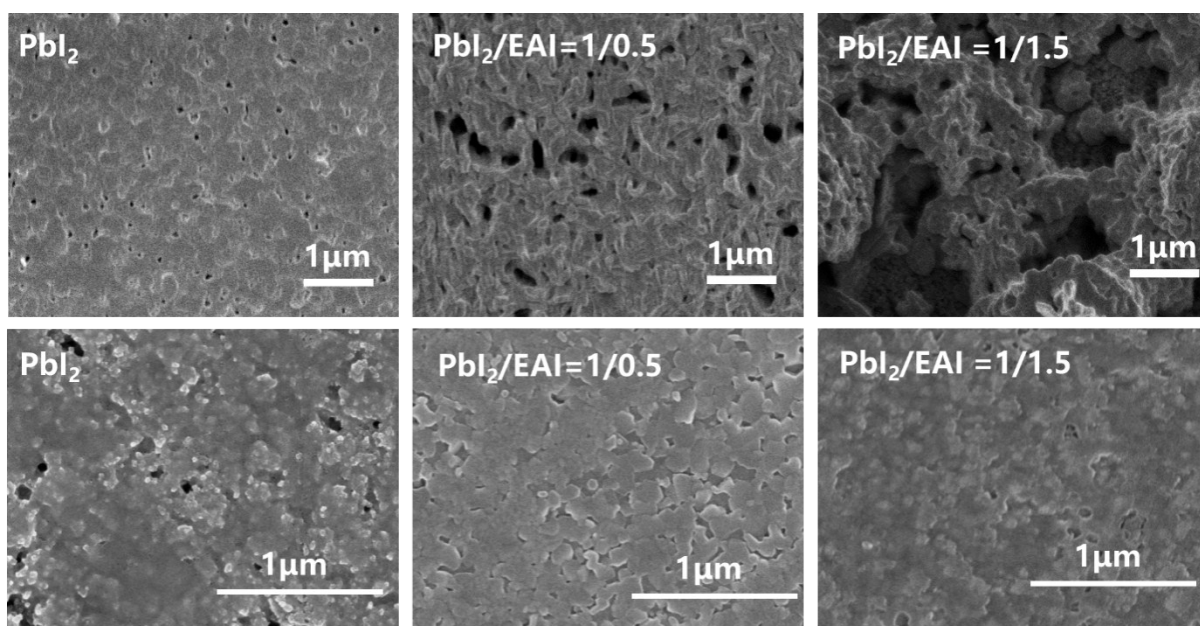

Fig. S6 The top-view SEM images of the 1D EAPbI<sub>3</sub> films obtained from the PbI<sub>2</sub>/EAI solutions with different ratios (the ratio of PbI<sub>2</sub>/EAI=1/0, 1/0.5, 1/1.5) before and after the MA gas treatment.
